# Supplementary material for: Dual-amplification colorimetric detection of bisphenol A based on catalytic hairpin assembly and DNAzyme-caused fragment self-assembly hybridization chain reaction
Source: Royal Society of Chemistry journal article supplement (doi:10.1039/d3ay00409k), 2023-01-01
Supplement: d3ay00409k1.pdf [file d3ay00409k1.pdf]

*Supporting Information*

**Dual-amplification colorimetric detection of bisphenol A  
based on catalytic hairpin assembly and DNzyme-caused  
fragment self-assembly hybridization chain reaction**

Wen Yun <sup>a</sup>, Yiyang Lin <sup>a</sup>, Ruiqi Wang <sup>a</sup>, Xia Ha <sup>a</sup>, Nana Xie <sup>a</sup>, Xiaoli Xiong <sup>a</sup>, Zhengwei Xiong <sup>c</sup>,  
Ning Li <sup>a,\*</sup>, Xingmin Wang <sup>a,\*</sup>, Lizhu Yang <sup>b,\*</sup>

<sup>a</sup> *Chongqing Key Laboratory of Catalysis and New Environmental Materials, College of  
Environment and Resources, Chongqing Technology and Business University, Chongqing,  
400067, China.*

<sup>b</sup> *School of Pharmaceutical Sciences, Wenzhou Medical University, Wenzhou, Zhejiang,  
325035, China*

<sup>c</sup> *Collaborative Innovation Center for Child Nutrition and Health Development, Chongqing  
University of Education, Chongqing 400067, P.R. China*

**Table S1.** The specific sequences used in detecting BPA

| Notes          | Sequences (5' to 3')                                                                                |
|----------------|-----------------------------------------------------------------------------------------------------|
| <b>Aptamer</b> | CCACCGGTAGTGCCGCCTACCGGTGGGTGGTCAGGTGGGATAGCGT<br>TCCGCGTATGGCCCAGCGCATCACGGGTTCGCACCA <sup>1</sup> |
| <b>H1</b>      | CATCTCTTCTCCGAGAAACGCGGCACTACCGGTGGGTTTTATGCCAC<br>CGGTAGTGCCGGTCGAAATAGTGAGT                       |
| <b>H2</b>      | CATCTCTTCTCCGAGCACTACCGGTGGCATAAAACAGTGCCGCGTTT<br>TATGCCACCCGGTCGAAATAGTGAGT                       |
| <b>H3</b>      | CATCTCTTCTCCGAGGTGGCATAAAACGCGGCACTCCACCGGTAGT<br>GCCGCGTTTCCGGTCGAAATAGTGAGT                       |
| <b>SH1</b>     | CACCACCAAAACTCACTATrAGGAAGAGATGATGGGTGGTGGTTTTTC<br>ATAACCTT                                        |
| <b>S1</b>      | AAGGTTTCATCTCTTCC                                                                                   |

#### References

- 1 M. Jo, J. Y. Ahn, J. Lee, S. Lee, S. W. Hong, J. W. Yoo, J. Kang, P. Dua, D. K. Lee, S. Hong and S. Kim, *Oligonucleotides*, 2011, **21**, 85-91.
